# Supplementary material for: Residence in a Hispanic Enclave Is Associated with Inferior Overall Survival among Children with Acute Lymphoblastic Leukemia
Source: MDPI journal article supplement (doi:10.3390/ijerph18179273), 2021-09-02
Supplement: s1 [file s1]

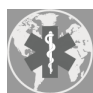

## Supplementary Material

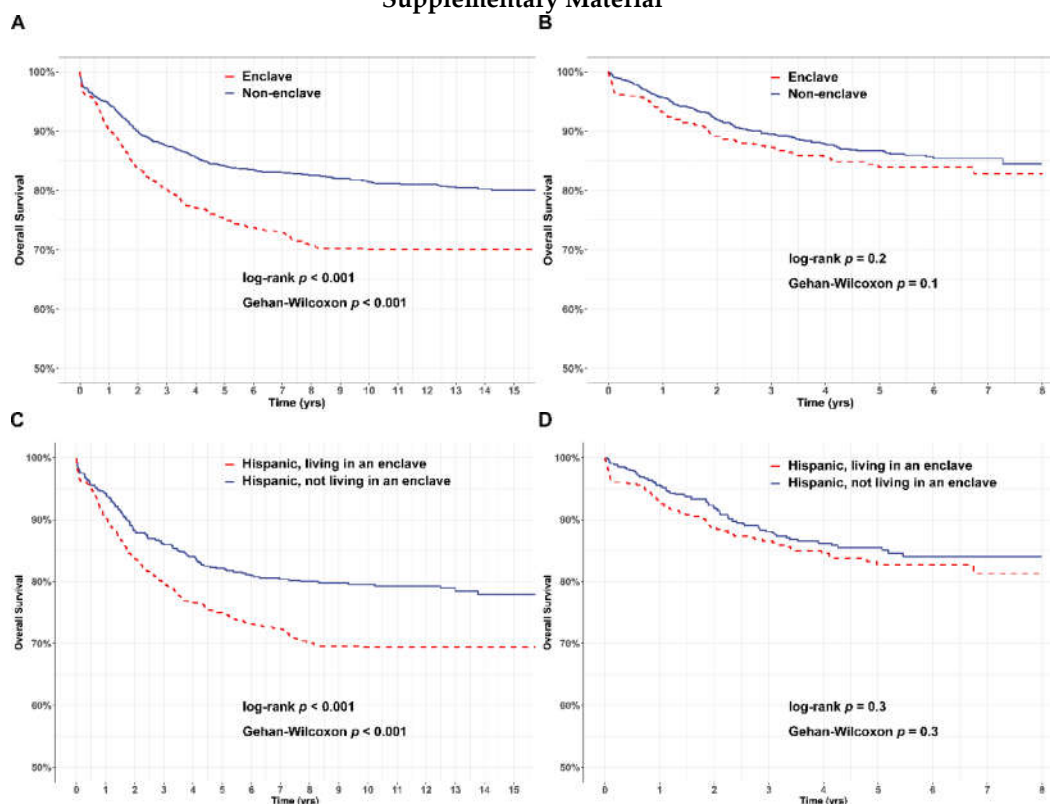

**Figure S1.** Kaplan-Meier analysis indicates children living in Hispanic enclaves experienced poorer overall survival during the earlier but not the latter half of the study period. Survival estimates for children living in enclaves are shown in red; survival estimates for children not living in enclaves are shown in blue. Comparison of five-year overall survival for (A) children living in enclaves vs. not, 1995–2004. (B) Hispanic children living in enclaves vs. not, 1995–2004. (C) children living in enclaves vs. not, 2005–2011. (D) Hispanic children living in enclaves vs. not, 2005–2011.

**Table S1.** Estimated 5-year overall survival and hazard of death for children living in Hispanic enclaves, stratified by year of diagnosis.

| Study sample and diagnosis period | N at risk<br>(5-year OS) | 5-year OS<br>% (95% CI) | cHR<br>(95% CI)  | aHR<br>(95% CI) <sup>1</sup> | aHR<br>(95% CI) <sup>2</sup> |
|-----------------------------------|--------------------------|-------------------------|------------------|------------------------------|------------------------------|
| Children Diagnosed 1995–2004      |                          |                         |                  |                              |                              |
| All children                      |                          |                         |                  |                              |                              |
| Not living in an enclave          | 1,300                    | 84.1 (82.3–86.0)        | 1.00             | 1.00                         | 1.00                         |
| Living in an enclave              | 513                      | 75.1 (71.9–78.4)        | 1.67 (1.39–1.99) | 1.42 (1.11–1.82)             | 1.39 (1.07–1.79)             |
| Hispanic children                 |                          |                         |                  |                              |                              |
| Not living in an enclave          | 427                      | 82.1 (78.9–85.5)        | 1.00             | 1.00                         | -                            |
| Living in an enclave              | 459                      | 74.6 (71.2–78.2)        | 1.53 (1.21–1.93) | 1.48 (1.10–2.00)             | -                            |
| Children Diagnosed 2005–2011      |                          |                         |                  |                              |                              |
| All children                      |                          |                         |                  |                              |                              |
| Not living in an enclave          | 484                      | 86.7 (84.7–88.8)        | 1.00             | 1.00                         | 1.00                         |
| Living in an enclave              | 178                      | 84.0 (80.6–87.5)        | 1.21 (0.91–1.61) | 0.92 (0.64–1.31)             | 0.89 (0.62–1.27)             |
| Hispanic children                 |                          |                         |                  |                              |                              |
| Not living in an enclave          | 199                      | 85.5 (82.3–88.8)        | 1.00             | 1.00                         | -                            |
| Living in an enclave              | 149                      | 82.7 (79.0–86.7)        | 1.19 (0.85–1.65) | 1.07 (0.71–1.61)             | -                            |

<sup>1</sup> Adjusted for sex, age at diagnosis, year of diagnosis, metropolitan vs. non-metropolitan residence, and census tract Area Deprivation Index score, with observations clustered by census tract. <sup>2</sup> Adjusted for race/ethnicity, sex, age at diagnosis, year of diagnosis, metropolitan vs. non-metropolitan residence, and census tract Area Deprivation Index score, with observations clustered by census tract.
